# Supplementary material
Source: publisher site journal article supplement (http://www.kjim.org/upload/media/kjim-2019-129-suppl2.pdf)
Supplement: Supplementary file 1 [file kjim-2019-129-suppl2.pdf]

**Supplementary Table 2. Clinical outcomes during initial 6 cycles of cisplatin-doublet chemotherapy**

| Variable                           | Gemcitabine cisplatin | Capecitabine cisplatin |
|------------------------------------|-----------------------|------------------------|
| Best response                      |                       |                        |
| Partial response                   | 15 (15.6)             | 21 (21.9)              |
| Stable disease                     | 8 (8.3)               | 34 (35.4)              |
| Overall response rate              | 36 (37.5)             |                        |
| Disease control rate               | 78 (81.3)             |                        |
| Survival outcome                   |                       |                        |
| Median PFS during initial 6 cycles | 5.13 (4.51–5.74)      | 4.23 (3.41–5.05)       |

Values are presented as number (%) or 95% confidence interval.  
PFS, progression-free survival.
